# Supplementary material
Source: PubMed Central journal article supplement (PMC3840168)
Supplement: NIHMS507042-supplement-Supplemental.pdf [file NIHMS507042-supplement-Supplemental.pdf]

Neuron, volume 69

**Supplemental Information**

**Entering Adolescence: Resistance to Peer Influence,  
Risky Behavior, and Neural Changes  
in Emotion Reactivity**

Jennifer H. Pfeifer, Carrie L. Masten, William E. Moore III, Tasha M. Oswald, John C. Mazziotta, Marco  
Iacoboni, and Mirella Dapretto

Supplementary Figure 1

*Neural responses to facial expressions of emotion in late childhood and early adolescence.*

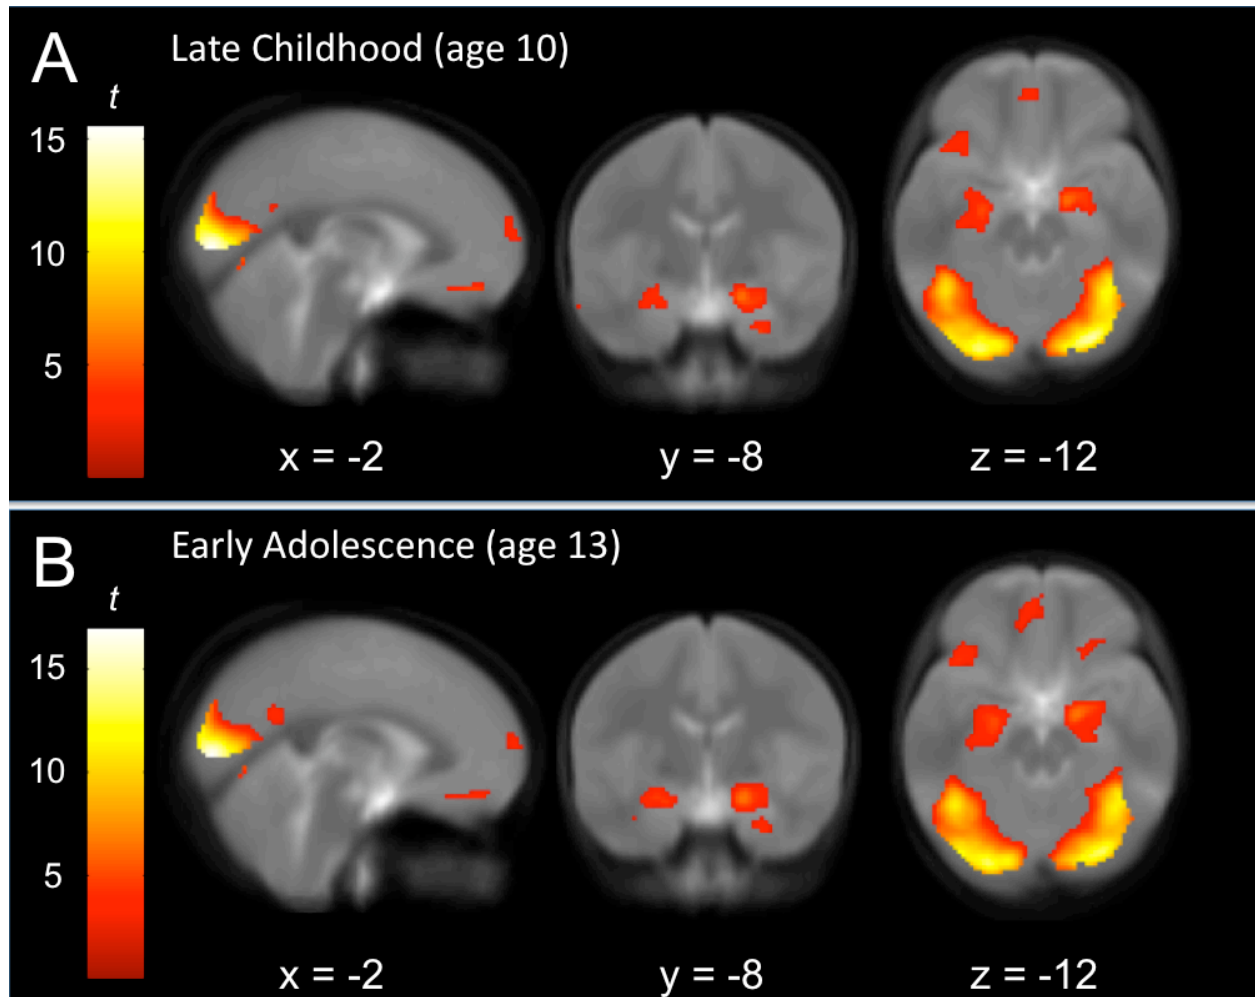

Panels A and B depict BOLD signal during observation of emotional expressions during late childhood and early adolescence, respectively. Results are displayed on the average coplanar high-resolution scan across both timepoints for all children. x, y, and z refer to the Talairach coordinates corresponding to the left-right, anterior-posterior, and inferior-superior axes, respectively.
